# Supplementary material
Source: Springer Nature journal article supplement (https://www.springermedizin.de/resource/supplementary/12986_2009_205_MOESM2_ESM.pdf/25655588)

**A**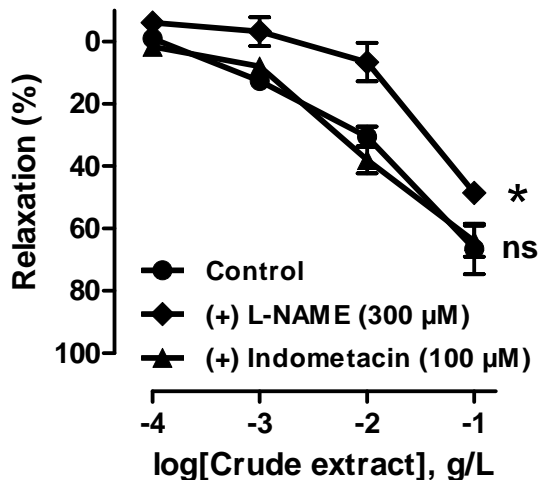**B**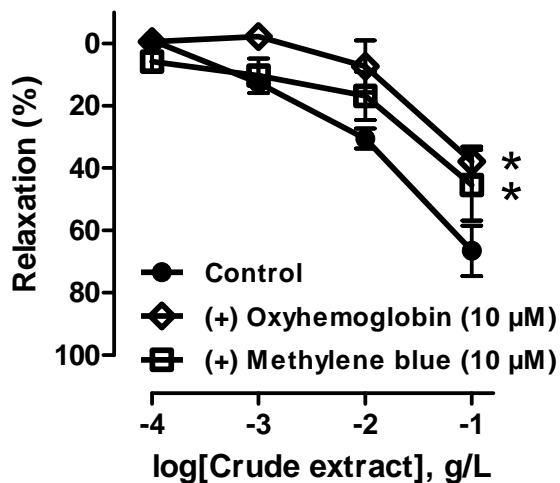**C**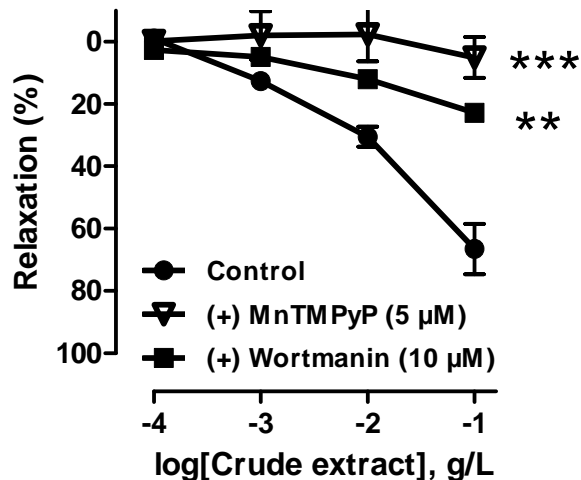**D**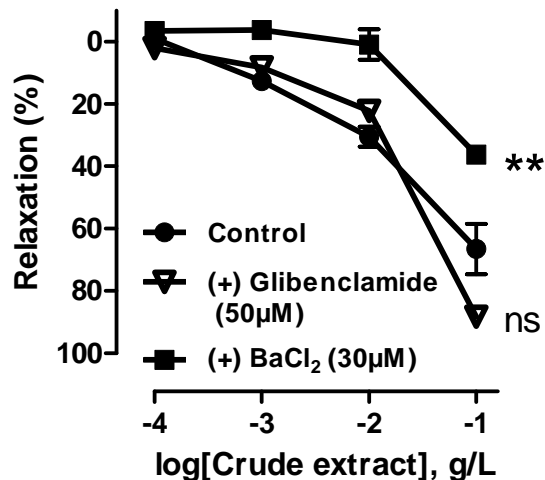

Supplement: MOESM2 [file 25655588]
